# Supplementary material for: Circular RNA circTmem241 drives group III innate lymphoid cell differentiation via initiation of Elk3 transcription
Source: PubMed Central journal article supplement (PMC9372085; doi:10.1038/s41467-022-32322-z), 2022-08-11
Supplement: 41467_2022_32322_MOESM1_ESM.pdf [file 41467_2022_32322_MOESM1_ESM.pdf]

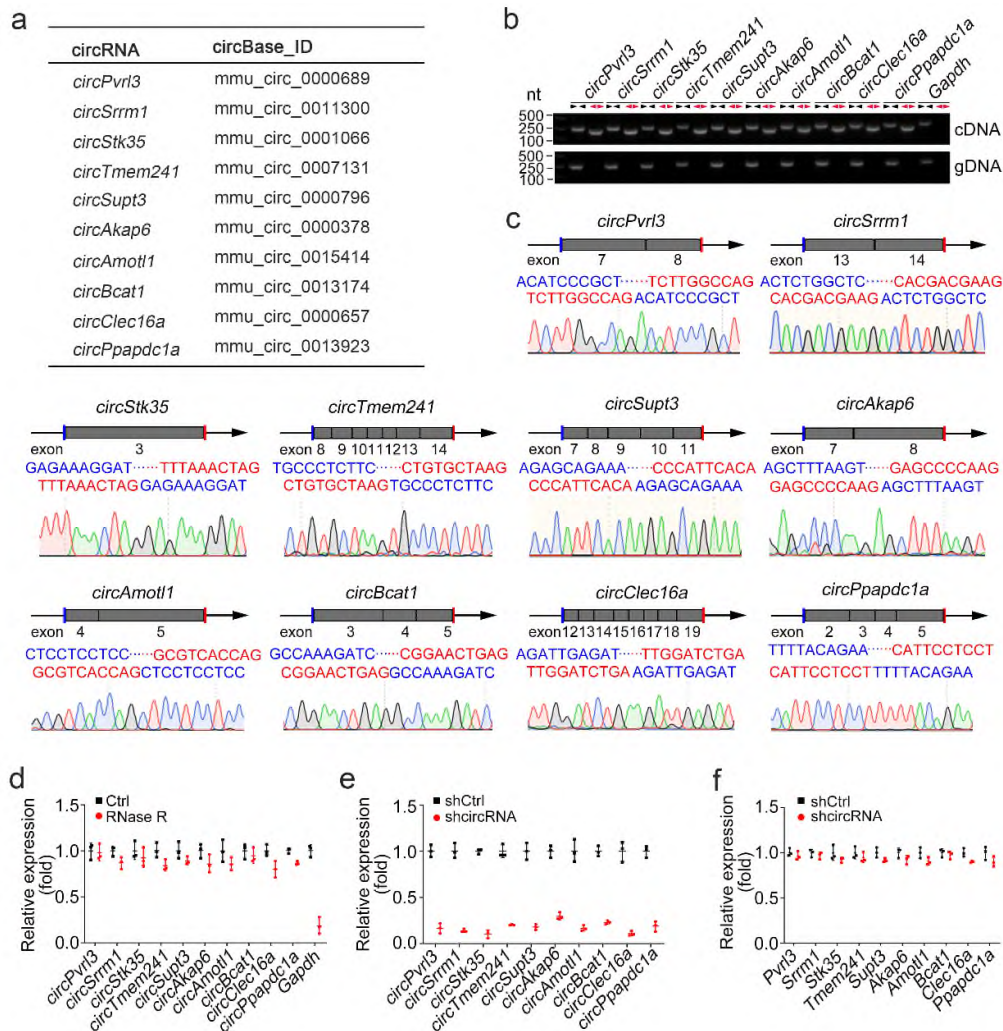

**Supplementary Fig. 1. Validation of top 10 highly expressed circRNAs in ILC3s.** (a) Information of top 10 highly expressed circRNAs. (b) Both convergent (black arrowheads) and divergent (red arrowheads) primers were used to amplify circRNAs from complementary DNA (cDNA) or genomic DNA (gDNA) in ILC3s. (c) CircRNAs were amplified by divergent primers and subjected to Sanger sequencing for validation of the back-splicing junction sites. (d) Total RNAs were extracted from ILC3s and treated with or without 3 U/ $\mu$ g RNase R at 37°C for 1 h, followed by RNA purification and qRT-PCR analysis of circRNAs.  $n=3$  for each group. (e, f) After infected with virus expressing shRNAs or scramble vector, CHILPs (Lin<sup>-</sup>CD25<sup>-</sup>CD127<sup>+</sup>Flt3<sup>-</sup> $\alpha$ 4 $\beta$ 7<sup>+</sup>) were isolated for knockdown validation of circRNAs (e) and their parental genes (f) via qRT-PCR analysis.  $n=3$  for each group. Data were analyzed by an unpaired Student's  $t$ -test and shown as means  $\pm$  SD. Data are representative of at least three independent experiments. Source data are provided as a Source Data file.

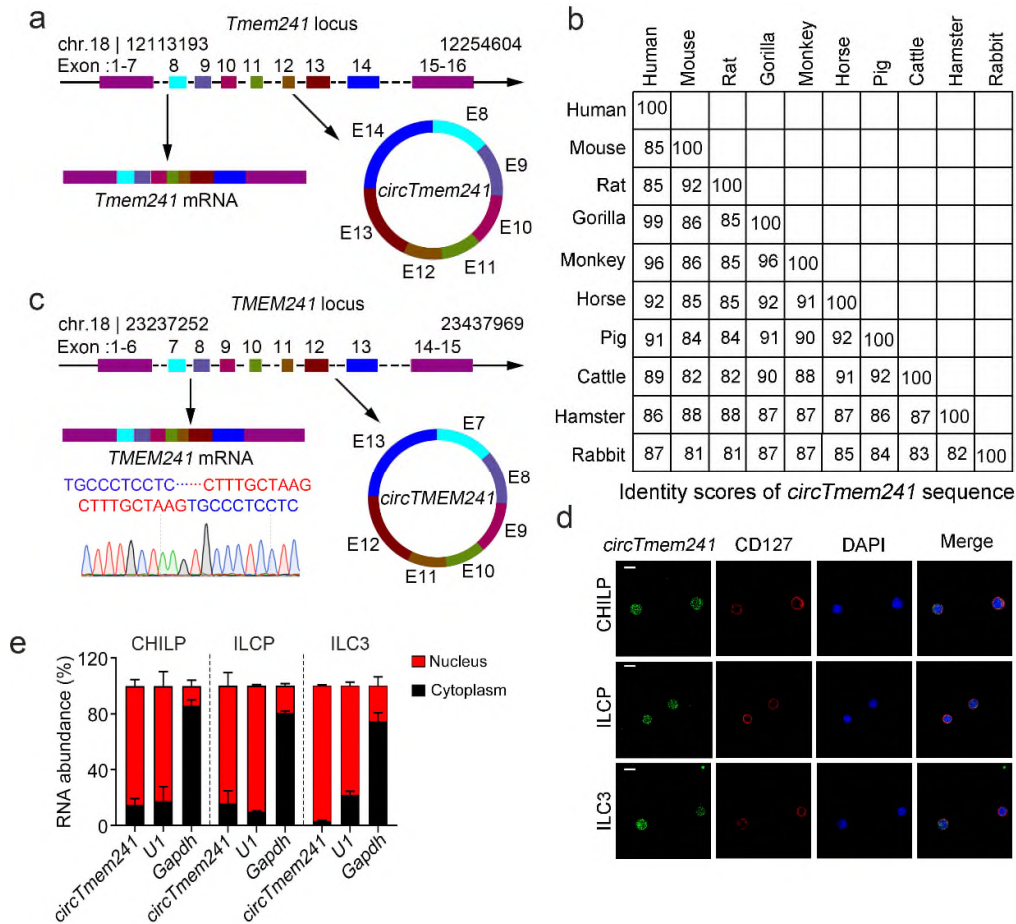

**Supplementary Fig. 2. Analysis of *circTmem241* conservation across species.** (a) Schematic representation of mouse *circTmem241*. (b) Conservation analysis of *circTmem241* in indicated vertebrate animals. (c) Validation of human *circTMEM241* in isolated human LPLs. Back-splicing site of *circTMEM241* was amplified by PCR, followed by Sanger sequencing. (d) FISH and IF staining of isolated CHILPs, ILCPs and ILC3s with indicated probes and antibodies. Scale bars, 10  $\mu\text{m}$  (e) CHILPs (left), ILCPs (middle) and ILC3s (right) were sorted by FACS and subjected to nuclear and cytoplasmic isolation, followed by RNA extraction and qRT-PCR analysis of *circTmem241*.  $n=3$  for each group. \*  $P < 0.05$ , \*\*  $P < 0.01$  and \*\*\*  $P < 0.001$ . Data were analyzed by an unpaired Student's  $t$ -test and shown as means  $\pm$  SD. Data are representative of at least three independent experiments. Source data are provided as a Source Data file.

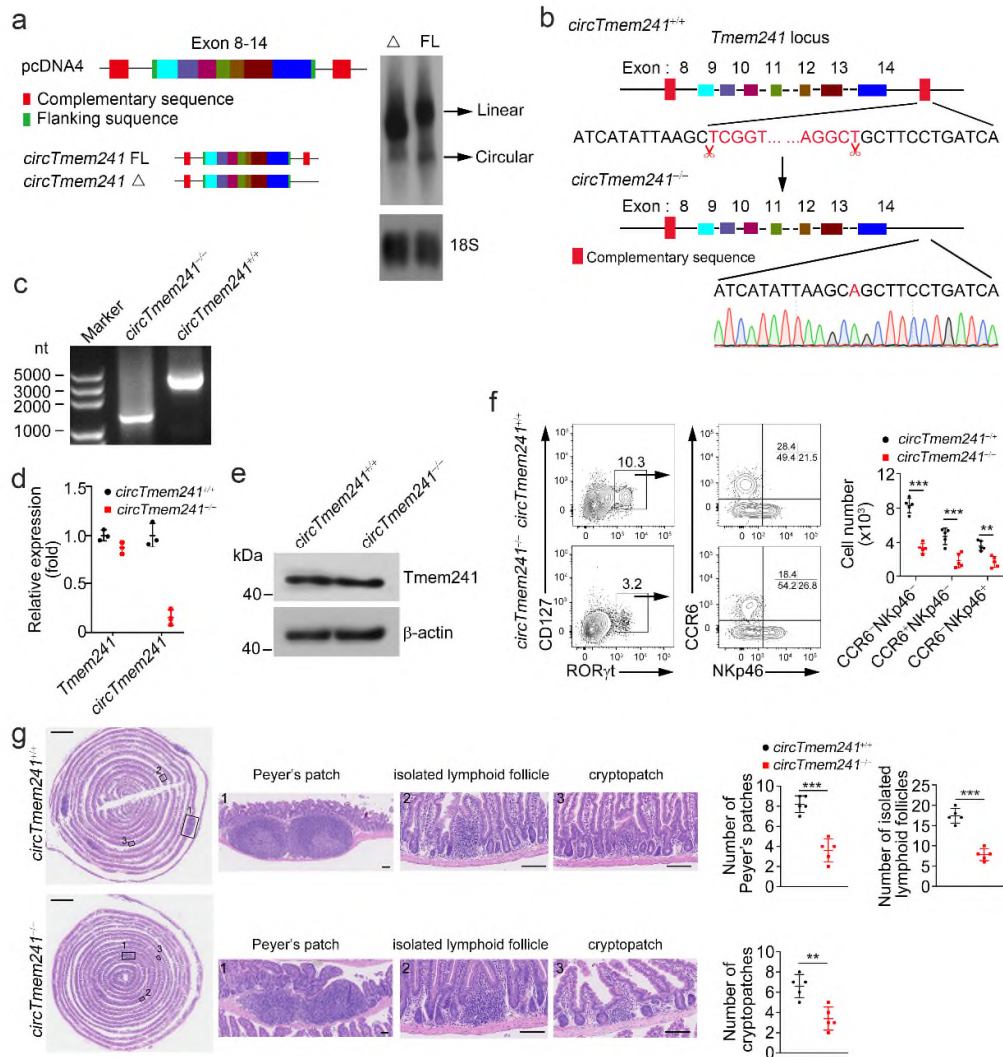

**Supplementary Fig. 3. Generation of *circTmem241* knockout mice.** (a) Diagram of minigene assay. Exons and complementary introns for *circTmem241* formation were cloned into pcDNA4 vector, followed by transfection into 293T cells. Total RNAs were extracted and *circTmem241* formation was measured by Northern blotting. (b) Construction diagram of *circTmem241* knockout mouse and DNA sequencing for knockout validation. (c) Genotyping presentation of *circTmem241* knockout mice by PCR analysis. (d) *Tmem241* and *circTmem241* gene expression in indicated ILC3s was tested via qRT-PCR analysis. n=3 for each group. (e) *Tmem241* protein levels in ILC3s were detected by Western blotting. (f) Subsets of ILC3s (CD3<sup>-</sup>CD19<sup>-</sup>CD45<sup>low</sup> gated) were analyzed in small intestines of *circTmem241*<sup>+/+</sup> and *circTmem241*<sup>-/-</sup> mice by FACS. n=5 for each group. (g) Small intestines from *circTmem241*<sup>+/+</sup> and *circTmem241*<sup>-/-</sup> mice were collected and subjected to HE staining, followed by analysis of indicated gut-associated lymphoid tissues. n=5 for each group. Data were analyzed by an unpaired Student's *t*-test and shown as means ± SD. Data are representative of at least three independent experiments. Source data are provided as a Source Data file.



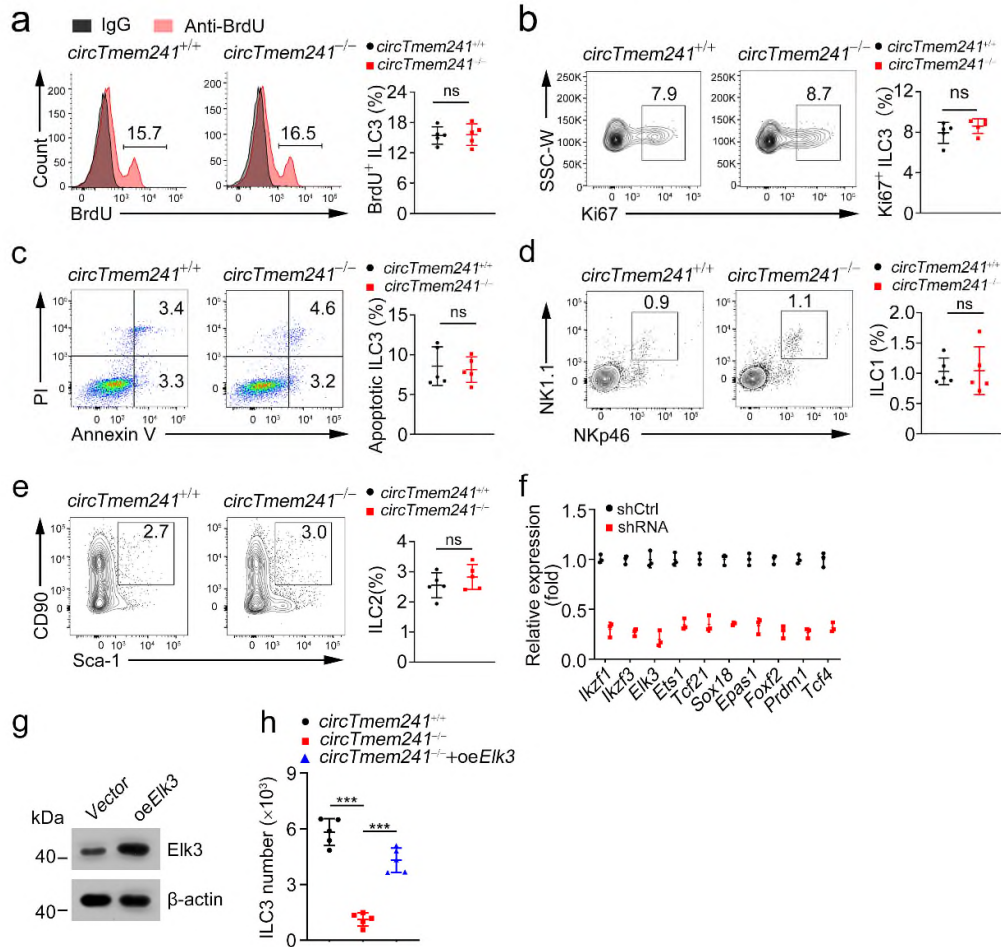

**Supplementary Fig. 4. *CircTmem241* deficiency does not affect proliferation or cell death of ILC3s.** (a) 100mg/kg dosage of BrdU was intraperitoneally injected into *circTmem241*<sup>+/+</sup> and *circTmem241*<sup>-/-</sup> mice and BrdU<sup>+</sup> ILC3s were analyzed 18 h later by FACS. n = 5 for each group. (b) Proliferation analysis of Ki67<sup>+</sup> ILC3s in *circTmem241*<sup>+/+</sup> and *circTmem241*<sup>-/-</sup> mice by FACS. n = 5 for each group. (c) Apoptosis detection of ILC3s by PI plus Annexin-V staining. n = 5 for each group. (d, e) FACS analysis of ILC1s and ILC2s. Percentages were counted in the right panel. n = 5 for each group. CHILPs were isolated for *in vitro* differentiation assay. (f) Top 10 downregulated TFs in ILCPs were knocked down by shRNAs, knockdown efficiency was detected by qRT-PCR analysis. n=3 for each group. (g) Elk3 overexpression was validated by Western blotting. (h) Hematopoietic progenitor cells from *circTmem241*<sup>+/+</sup> and *circTmem241*<sup>-/-</sup> mice were infected with *Elk3*-expressing or scramble sequence and subjected to *in vitro* differentiation assay, followed by FACS analysis of ILC3s. n=5 for each group. \*\*\*  $P < 0.001$ . Data are shown as means  $\pm$  SD. Data are representative of at least three independent experiments. Data were analyzed by an unpaired Student's *t*-test and shown as means  $\pm$  SD. Data are representative of at least three independent experiments. Source data are provided as a Source Data file.

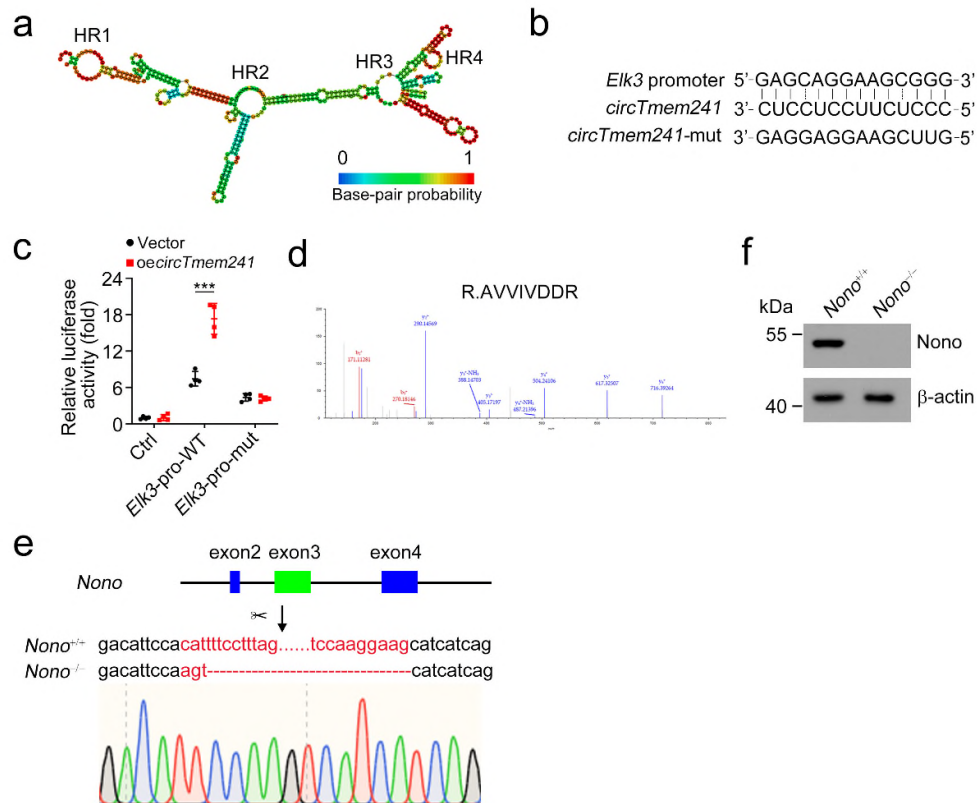

**Supplementary Fig. 5. *circTmem241* interacts with Nono.** (a) Secondary structure prediction of *circTmem241* by RNAfold Server (<http://rna.tbi.univie.ac.at/>) using minimum free energy (MFE) and partition function methods. 4 major hairpin regions (HRs) were identified. (b) Sequences of binding region between *circTmem241* transcript and *Elk3* promoter. Pairing region of *circTmem241* was mutated as indicated. (c) Luciferase reporter assay was performed using indicated *Elk3* promoters to validate *circTmem241* function on *Elk3* transcription activation. WT, wild-type; mut, mutation. n=4 for each group. (d) Peptides of Nono were identified by mass spectrometry. (e) Diagram of *Nono* knockout by *in vitro* AAV delivery of targeting guide RNAs into hematopoietic progenitor cells from *Vav-Cre;Cas9-KI* mice, which was validated by DNA sequencing. (f) Knockout of *Nono* was detected by Western blotting. Data were analyzed by an unpaired Student's *t*-test and shown as means  $\pm$  SD. Data are representative of at least three independent experiments. Source data are provided as a Source Data file.

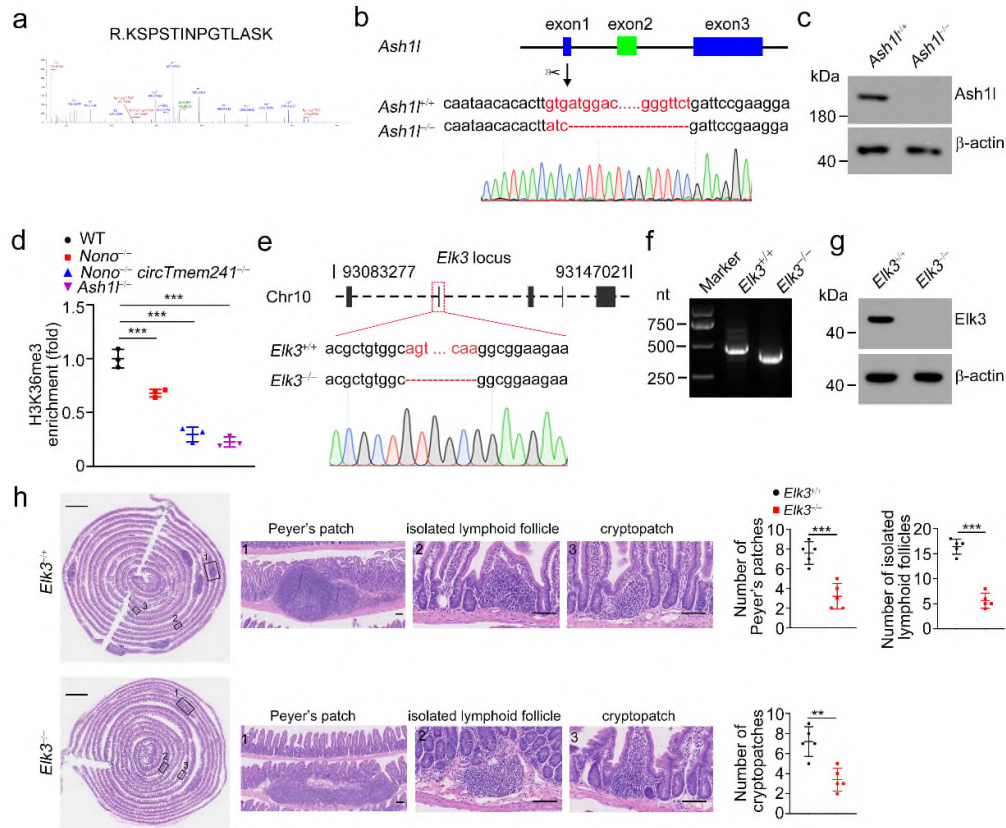

**Supplementary Fig. 6. Generation of *Ash1* deleted hematopoietic progenitor cells and *Elk3* knockout mice.** (a) Peptides of *Ash1* were identified by mass spectrometry. (b) Diagram of *Ash1* knockout by *in vitro* AAV delivery of targeting guide RNAs into hematopoietic progenitor cells from *Vav-Cre;Cas9-KI* mice, which was validated by DNA sequencing. (c) Knockout of *Ash1* was detected by western blotting. (d) ChIP assay was conducted using indicated hematopoietic progenitor cells to measure H3K36me3 enrichment on *Elk3* promoter.  $n=3$  for each group. (e) Diagram of *Elk3* knockout mice and validation by DNA sequencing. (f) Genotyping of *Elk3* knockout mice by PCR analysis. (g) Western blotting analysis of *Elk3* expression in *Elk3*<sup>+/+</sup> and *Elk3*<sup>-/-</sup> mice. (h) Small intestines from *Elk3*<sup>+/+</sup> and *Elk3*<sup>-/-</sup> mice were collected and subjected to HE staining, followed by analysis of indicated gut-associated lymphoid tissues.  $n=5$  for each group. \*\*\*  $P < 0.001$ . Data were analyzed by an unpaired Student's *t*-test and shown as means  $\pm$  SD. Data are representative of at least three independent experiments. Source data are provided as a Source Data file.

**Supplementary Table 1. Sequences of wild type and mutant *circTmem241* in this study**

| Loop | Wild-type sequence    | Mutant sequence        |
|------|-----------------------|------------------------|
| HR1  | 5'-CCUCUCCUCCUCUGU-3' | 5'-ACAGAGGAUCCUCUGU-3' |
| HR2  | 5'-CUUCUCAU-3'        | 5'-CUUCGAAG-3'         |
| HR3  | 5'-GACAUGCU-3'        | 5'-GACAU AUGCU-3'      |
| HR4  | 5'-AUGUCU-3'          | 5'-AUGUCGACAU-3'       |

**Supplementary Table 2. sgRNAs for CRISPR/Cas9-mediated mouse construction and *in vitro* knockout in this study**

| Genes                     | sgRNA sequences                |
|---------------------------|--------------------------------|
| <i>circTmem241</i> (up)   | 5'-AAGCATCATATTAAGCTCGGTGG-3'  |
| <i>circTmem241</i> (down) | 5'-AAGTATGTGGGTCTGTAAGGAGG-3'  |
| <i>Elk3</i> (up)          | 5'-GGTCCAGCAGCAAGTGCAAGAGG-3'  |
| <i>Elk3</i> (down)        | 5'-CGAGTTCAAGCTCCTCAAGGCGG-3'  |
| <i>Nono</i> (up)          | 5'-TTGTACCCTAAAGGAAAATGTGG-3'  |
| <i>Nono</i> (down)        | 5'-TGATGCTGATGATGCTTCCTTGG-3'  |
| <i>Ash1l</i> (up)         | 5'-TCACAAGTGTGTTATTGCCAAGG -3' |
| <i>Ash1l</i> (down)       | 5'-GGATTGGGTTCTGATTCCGAAGG-3'  |



**Supplementary Table 3. qPCR primers used in this study**

| Genes               | Forward                         | Reverse                        |
|---------------------|---------------------------------|--------------------------------|
| <i>circPvrl3</i>    | 5'-AATTCCTTCTCTCCCTCAGAAA-3'    | 5'-CAAAGACGGTGATGATGAAGAG-3'   |
| <i>circSrrm1</i>    | 5'-TAGTAGAAGGAGGAGAAGTCCC-3'    | 5'-GTTCTTTACATGGGATCTCTTGG-3'  |
| <i>circStk35</i>    | 5'-TGATGCTTTTGAACCTGAAACC-3'    | 5'-CTCCATGACAAACCAGAGATAG-3'   |
| <i>circTmem241</i>  | 5'-GAGTTTTGGGATTCTTCCTCAT-3'    | 5'-GATCAAACCTGAGAGTCTTGGAA-3'  |
| <i>circSupt3</i>    | 5'-CCTCTCTCCCCATTACACAAGAG-3'   | 5'-AAACTTAACTGTCGGCTTTTAC-3'   |
| <i>circAkap6</i>    | 5'-GAAGGACATGCTGAAGATGATT-3'    | 5'-GTGACTGTCTACGTTCAACTTAA-3'  |
| <i>circAmotl1</i>   | 5'-CCATGAGATGGTCAAACCTTAC-3'    | 5'-CTTCATGCCTCCCAGAATAGAG-3'   |
| <i>circBcat1</i>    | 5'-CCTAAAGTGTATTCTTCAGCTTCTA-3' | 5'-GTCAGTAAACGTAGCTCCAAAG-3'   |
| <i>circClec16a</i>  | 5'-GGTATTCTTCATGCTGCGTTCC-3'    | 5'-CTTCTCCTCGTCTGTGGTGTTCC-3'  |
| <i>circPpapdc1a</i> | 5'-GATTTCTTTTACCGCTGCTTTC-3'    | 5'-TTATAGAGCCAGATCTCTTCCG-3'   |
| <i>Pvrl3</i>        | 5'-GGTCTTCAGCCCTCTAATGGA-3'     | 5'-GGGTTGCGTGGGTGATGTT-3'      |
| <i>Srrm1</i>        | 5'-CCAAGACGACGACCATCTCC-3'      | 5'-GACGAGCTACTTCCAGACAGG-3'    |
| <i>Stk35</i>        | 5'-AGCTACGGCGTGGTTTATGAG-3'     | 5'-AATTCTGCTAGTGCCAACTCC-3'    |
| <i>Tmem241</i>      | 5'-CCAGAATGGCTGACCATCAAG-3'     | 5'-ATCCCCAGAACCCACGGAG-3'      |
| <i>Supt3</i>        | 5'-AAAGGCATTGACGAGGATGAC-3'     | 5'-CCTGTCTGGTTCGATAGAGTTGAT-3' |
| <i>Akap6</i>        | 5'-AGGACTCATCTCAAGTGATCCTT-3'   | 5'-TTCAGCAGCGTTTGTGAGTGT-3'    |
| <i>Amotl1</i>       | 5'-ATGTAGCCTCTGGAAGAGTGT-3'     | 5'-TGAGTGAGGGTTTCCGTGGA-3'     |
| <i>Bcat1</i>        | 5'-CCCATCGTACCTCTTTCACCC-3'     | 5'-GGGAGCGTGGGAATACGTG-3'      |
| <i>Clec16a</i>      | 5'-GCAAGTCTCCCGCAACAT-3'        | 5'-GAGCAGGTTCCGATTTTGTCT-3'    |
| <i>Ppapdc1a</i>     | 5'-CCCTTCTCTTCGGGGTCTTTG-3'     | 5'-CGGGTAGGTATGTTGTCTGACT-3'   |
| <i>Ikzf1</i>        | 5'-ATGTCCCAAGTTTCAGGAAAG-3'     | 5'-GCACGCCATTCTCTTCATC-3'      |
| <i>Ikzf3</i>        | 5'-CTGAATGACTACAGCTTGCCC-3'     | 5'-GCTCCGGCTTCATAATGTTCT-3'    |
| <i>Elk3</i>         | 5'-TCCTCACGCGGTAGAGATCAG-3'     | 5'-GTGGAGGTAAGTTCGTTGCGG-3'    |
| <i>Ets1</i>         | 5'-CCTATCAGCTCGGAAGAACTC-3'     | 5'-TCTTGCTTGATGGCAAAGTAG-3'    |
| <i>Tcf21</i>        | 5'-CCCACTAAGAAAAGCCCGCTC-3'     | 5'-CCGTTCTCGTACTTGTGCTTG-3'    |
| <i>Sox18</i>        | 5'-CCTGTCACCAACGTCTCGC-3'       | 5'-GCAACTCGTCGGCAGTTTG-3'      |
| <i>Epas1</i>        | 5'-CTGAGGAAGGAGAAATCCCGT-3'     | 5'-TGTGTCCGAAGGAAGCTGATG-3'    |
| <i>Foxf2</i>        | 5'-CGTCCTCTTCTAACTCCGTC-3'      | 5'-TGTACGAGTAAGGAGGCTTCT-3'    |
| <i>Prdm1</i>        | 5'-TTCTCTTGGA AAAACGTGTG-3'     | 5'-GGAGCCGGAGCTAGACTTG-3'      |
| <i>Tcf4</i>         | 5'-AAGTCCGAAAAGTTCTCCG-3'       | 5'-CTCCATAGCCCGGCTGATT-3'      |
| <i>Gapdh</i>        | 5'-AGGTCGGTGTGAACGGATTTG-3'     | 5'-TGTAGACCATGTAGTTGAGGTCA-3'  |
| <i>U1</i>           | 5'-CGCTTACAAGCACGCAGATG-3'      | 5'-CCCGAATGCCTGATATTCACAT-3'   |
| <i>18S</i>          | 5'-TAACGAACGAGACTCTGGCAT-3'     | 5'-CGGACATCTAAGGGCATCACAG-3'   |

**Supplementary Table 4. Primers for PCR amplification of top 10 circRNAs (Con: convergent; Div: divergent primer)**

| Genes                     | Forward                      | Reverse                       |
|---------------------------|------------------------------|-------------------------------|
| <i>circPvrl3</i> (Con)    | 5'-CATCCCGCTTACGCAGACCT-3'   | 5'-TGGCCAAGAAGGTCTTTCTG-3'    |
| <i>circPvrl3</i> (Div)    | 5'-CTTGACAAAGTAATCGACCTTC-3' | 5'-GTCAGCAACACAGTCACAAAG-3'   |
| <i>circSrrm1</i> (Con)    | 5'-GCTCCTCTTCCACCTCAGAAG-3'  | 5'-GCTGGAGAAGGAGACCTTCGC-3'   |
| <i>circSrrm1</i> (Div)    | 5'-GCCAGAAGGCGAAGGTCTCCT-3'  | 5'-GCACTCCGAGAAGGGGAATGTC-3'  |
| <i>circStk35</i> (Con)    | 5'-TGTCCTGTCCCGGAGACCTG-3'   | 5'-GCCACAAGCTGAGGACAGCCAG-3'  |
| <i>circStk35</i> (Div)    | 5'-CACAGGACCGACCTGATGCT-3'   | 5'-CAGGTCTCCGGGACAGGACAT-3'   |
| <i>circTmem241</i> (Con)  | 5'-CTTGCTGCTGCAGGGTGCCT-3'   | 5'-GGAACCTGTAGAAATACAAGA-3'   |
| <i>circTmem241</i> (Div)  | 5'-GTTTTGGGATTCTTCCTCATG-3'  | 5'-CGAAGTATTTTGAAGAACCT-3'    |
| <i>circSupt3</i> (Con)    | 5'-CAAATCCGAGACTGGCTGGA-3'   | 5'-GTGTGTTCTCAGGAGAGTCTG-3'   |
| <i>circSupt3</i> (Div)    | 5'-TGTGGTGTGCGAGGCTCACAGC-3' | 5'-GTCCAGCCAGTCTCGGAATTTG-3'  |
| <i>circAkap6</i> (Con)    | 5'-CTTTAAGTTGAACGTAGACAG-3'  | 5'-GTCCCCTCCTCGTCCTCCACAG-3'  |
| <i>circAkap6</i> (Div)    | 5'-GCAACACAGCTGGATTCTCAG-3'  | 5'-CATGTCCTTCAGTCCTGCTTTG-3'  |
| <i>circAmotl1</i> (Con)   | 5'-GCATGAAGCATCTACTTTGAC-3'  | 5'-CCCTGTGGCCTGGTGCTGAATG-3'  |
| <i>circAmotl1</i> (Div)   | 5'-AGATGGTCAAACCTTACCCAG-3'  | 5'-GTCAAAGTAGATGCTTCATGCCT-3' |
| <i>circBcat1</i> (Con)    | 5'-GATCTCATCATCACACCAGCCA-3' | 5'-GCACATTCTATCCATGTTGAGGT-3' |
| <i>circBcat1</i> (Div)    | 5'-GCTCCTAAAGTGATTCTTCAG-3'  | 5'-GAGGACCACTCCACCGTCAGC-3'   |
| <i>circClec16a</i> (Con)  | 5'-GAGATGGTGATCATGAAGCTTG-3' | 5'-CTGGGAGCTGAATTCGTTTTAG-3'  |
| <i>circClec16a</i> (Div)  | 5'-TCCCTGTCACTGCAGCTGCG-3'   | 5'-CACTGTGCATTCTCTGAGTTC-3'   |
| <i>circPpapdc1a</i> (Con) | 5'-GGATCCATTCCAGAGATCAT-3'   | 5'-GCGAGGTCTTCCCACTATTAG-3'   |
| <i>circPpapdc1a</i> (Div) | 5'-TGCTTTCCAGATGGGGTGATG-3'  | 5'-GTAGGTATGTTGTCTGACTGC-3'   |
| <i>Gapdh</i> (Con)        | 5'-GCGCCTGGTCACCAGGGCTG-3'   | 5'-GACTCCACGACATACTCAGC-3'    |
| <i>Gapdh</i> (Div)        | 5'-GCTGAGTATGTCGTGGAGTC-3'   | 5'-GCAGCCCTGGTGACCAGGCG-3'    |

**Supplementary Table 5. Primers for ChIP assay in this study**

| Genes              | Forward                         | Reverse                         |
|--------------------|---------------------------------|---------------------------------|
| <i>Elk3</i> pro#1  | 5'-TATGGTAGAGAAAAGCTCGCTTAGG-3' | 5'-GTGCCCCGCCCCGCTTCCTGCT-3'    |
| <i>Elk3</i> pro#2  | 5'-TATAGTGCTGCTGTAAATATGCC-3'   | 5'-GCATAGAAGAAGAGTTTAGGGACAG-3' |
| <i>Elk3</i> pro#3  | 5'-GGAGTCCAGTCTTGAAACCACAG-3'   | 5'-TGGAGGCAGTTTTAGAGTTGG-3'     |
| <i>Elk3</i> pro#4  | 5'-CCATGTACTCTCATGCCAAACG-3'    | 5'-GCCCCTGAGGACAATGGCCAGGAT-3'  |
| <i>Elk3</i> pro#5  | 5'-GGCAAGGAAATGTCAGAATGTTG-3'   | 5'-GCTCATTAAGCCCTAATTGTAAC-3'   |
| <i>Elk3</i> pro#6  | 5'-GTCCTCAGTGTATAACCAGCAGG-3'   | 5'-TGCTATCTCTCTGAAAGATTGC-3'    |
| <i>Elk3</i> pro#7  | 5'-GCTGAGTGACTGGAGAAGCCAAC-3'   | 5'-GTTATACACTGAGGACCAGGCTTG-3'  |
| <i>Elk3</i> pro#8  | 5'-GTTCTGCCTTTTCTGGGAGAGGTG-3'  | 5'-GCAAACTCAGACTGTGTCCCT-3'     |
| <i>Elk3</i> pro#9  | 5'-GAACCTTTCTTGACACAACCTC-3'    | 5'-GCAGAACTATTGGCGCAGTGAG-3'    |
| <i>Elk3</i> pro#10 | 5'-GTGCTGGAGATTGAACTCATGG-3'    | 5'-GGTTCGTCATTTGTAAGTGGT-3'     |

**Supplementary Table 6. shRNA sequences used in this study**

| Genes               | shRNA sequences             |
|---------------------|-----------------------------|
| <i>circPvrl3</i>    | 5'- TGGCCAGACATCCCGCTTA-3'  |
| <i>circSrrm1</i>    | 5'- CGAAGACTCTGGCTCCTCT -3' |
| <i>circStk35</i>    | 5'- GTTTTTAAACTAGGAGAAA -3' |
| <i>circTmem241</i>  | 5'-TGCTAAGTGCCCTCTTCCT-3'   |
| <i>circSupt3</i>    | 5'- TCACAAGAGCAGAAAGACA -3' |
| <i>circAkap6</i>    | 5'-GCCCCAAGAGCTTTAAGTT-3'   |
| <i>circAmotl1</i>   | 5'-TCACCAGCTCCTCCTCCA-3'    |
| <i>circBcat1</i>    | 5'-TCGGAAGTGAAGGCAAAGA-3'   |
| <i>circClec16a</i>  | 5'-ATCTGAAGATTGAGATGGT-3'   |
| <i>circPpapdc1a</i> | 5'-GTGGGAAGTTTTACAGAAT-3'   |
| <i>Ikzf1</i>        | 5'-GGCATGTACCCAGTCATTA-3'   |
| <i>Ikzf3</i>        | 5'-GCGACAGAGATGAGAACA-3'    |
| <i>Elk3</i>         | 5'-GCAGAGCGCTGAGATACTA-3'   |
| <i>Ets1</i>         | 5'-GAGCCAGTCGTGGTAAACT-3'   |
| <i>Tcf21</i>        | 5'-GTACGAGAACGGTTACATT-3'   |
| <i>Sox18</i>        | 5'-GCGACCATCCCAACTACAA-3'   |
| <i>Epas1</i>        | 5'-GACCAGCAAATGGATAACT-3'   |
| <i>Foxf2</i>        | 5'-GCCTCGTCCTCTTCTAACT-3'   |
| <i>Prdm1</i>        | 5'-GGAGGACGCTGATATGACT-3'   |
| <i>Tcf4</i>         | 5'-GTCCACGTTCCATCGTAGT-3'   |
